# Supplementary material for: Nurses' roles in emerging chronic disease management: task delegation in Long COVID care as a paradigm - A cross-sectional study
Source: Research Square preprint supplement (doi:10.21203/rs.3.rs-7375791/v1), 2025-09-10
Supplement: Supplementary file 1 [file f899bfd0c6e5f5e7ed7e930a.docx]

**Informal Task Delegation in Long COVID Care by Nurses - Cross-sectional Study Questionnaire.**

This study is particularly interested in informal task delegation. Your participation is essential to better understand your roles and experiences in caring for patients with emerging chronic conditions such as Long COVID. Your responses will contribute to improving care and interventions for affected patients, as well as identifying the spontaneous assumption of new responsibilities in response to unmet patient needs.

Estimated time: 15-20 minutes

**A. General Information**

A1. Gender:

- Female
- Male
- Other, please specify: ...............................

A2. Age group:

- Under 25 years
- 25-29 years
- 30-34 years
- 35-39 years
- 40-44 years
- 45-49 years
- 50-54 years
- 55-59 years
- 60-65 years

**A3**. Practice setting :

- Private practice
- Public hospital employee
- Private hospital employee
- Elderly care facility employee
- Non-hospital employee of another structure (DAC or CPTS or SIO)
- Other, please specify: ...............................

**A4. Number of years of professional experience as a registered nurse:**

- Please specify: .......................................

**B. Experience with Long COVID Patients**

B1. Have you ever been confronted with the need to care for patients presenting persistent COVID symptoms (Long COVID)?

- **Yes** ➜ *Continue to section B*
- **No** ➜ *Go to section C*

➤ **IF YES to B1: ANALYSIS OF INFORMAL DELEGATION**

B2. In what contexts have you encountered these Long COVID patients? (Multiple answers possible)

- Family circle
- Friends/specific social circle
- In your usual professional practice
- Community/association setting

B3. Regarding your care of these Long COVID patients, how would you describe the framework of your intervention? (Single answer only)

- Established protocol/medical prescription
- Personal initiative/emergency situation
- Explicit request from patient/family

**C. Spontaneously Developed Roles and Informal Delegation Factors**

**C1.** Among the following roles, what has been your role with Long COVID patients? (Multiple answers possible)

- Psychological support (listening, etc.)
- Detection/screening (syndrome identification)
- Care pathway coordination
- Proximity care
- Clinical research
- Prevention
- Therapeutic education
- Nursing consultation
- Other, please specify: ...............

**C2.** In your daily practice, which roles do you exercise most frequently with patients at your workplace? (Multiple answers possible)

- Psychological support
- Proximity care
- Care pathway coordination
- Screening/detection
- Prevention
- Clinical research role
- Therapeutic education
- Nursing consultation
- Other, please specify: ...............

**C3.** Have you received specific training on Long COVID before developing these roles?

- Yes
- No, no training

If Yes, how did you acquire knowledge about Long COVID?

- In-service training
- External training
- Distance learning: please specify (checkboxes)
  - MOOC
  - Webinar
  - Web flash
  - Virtual classroom

**D. Willingness to Formalize**

D1. Would you be willing to assume care pathway coordination responsibilities for Long COVID patients?

- Yes
- No

D2. If NO, what are the obstacles? (Multiple answers possible)

- Feeling of current incompetence
- Lack of time
- Absence of Long COVID recognition (ALD status, etc.)
- Lack of specific resources in the territory
- Other: please specify

**E. Knowledge of the Disease**

E1. In your opinion, post-COVID-19 condition, also known as long-duration COVID-19, refers to prolonged symptoms observed in some people after contracting COVID-19?

- Completely agree
- Agree
- Disagree
- Completely disagree

E2. In your opinion, is your level of knowledge about persistent COVID symptoms satisfactory?

- Completely agree
- Agree
- Disagree
- Completely disagree

E3. In your opinion, do Long COVID symptoms alter patients' quality of life?

- Completely agree
- Agree
- Disagree
- Completely disagree
- Very good

E4. In your opinion, does Long COVID exist as a disease?

- Completely agree
- Agree
- Disagree
- Completely disagree

**F. Knowledge of Referral and Care Devices**

F1. Are you part of a specific system dedicated to caring for patients suffering from Long COVID?

- Yes
- No

**F2**. If yes, for how long have you been following Long COVID patients? Since:

- 3 months
- 6 months
- 9 months
- 12 months
- 18 months and more

F3. Are you aware of specific systems for caring for patients suffering from Long COVID?

- *Yes*
- *No*

F4. Do you know the following systems?

- DAC (Support and Coordination System)
  - Yes
  - No
- CPTS (Community of Health Territory Professionals)
  - Yes
  - No
- SIO (Nursing Orientation Service)
  - Yes
  - No

F5. Have you ever used any of these systems?

- Yes
- No

F6. Would you say you have the necessary resources to care for Long COVID patients?

- *Yes*
- *No*

**F7.** In your opinion, is the quality of information provided to patients or their relatives about Long COVID satisfactory?

- Completely agree
- Agree
- Disagree
- Completely disagree
- Very good

**G. Care Management Strategies**

**G1**. In your opinion, is multidisciplinary coordination necessary to manage Long COVID?

- Completely agree
- Agree
- Disagree
- Completely disagree

**G2.** Among the following proposals, which are relevant for supporting a Long COVID patient? (Multiple answers possible)

- Patient therapeutic education
- Adapted physical activity
- Psychological support
- ENT follow-up
- Only one of these activities
- Personalized multifactorial intervention (individualized and adapted response)
- Non-personalized multifactorial intervention (group)
- Other (please specify)

**G3.** What improvements or modifications do you suggest for caring for Long COVID patients?

- Improvement of professionals' skill level
- Improvement of information
- Increase in dedicated sites
- Improvement of intra-professional communication
- Improvement of public communication
- Others

**H. Long COVID and Work Organization**

H1. As a nurse, would you say that specific skills are needed to manage patients suffering from Long COVID?

- Yes
- No

H2. If yes, which ones? ...............................................................................................................................................................................

H3. In your opinion, has the emergence of Long COVID increased your workload?

- Completely agree
- Agree
- Disagree
- Completely disagree

H4. In your opinion, is your workload high, consequently making it difficult for you to care for Long COVID patients?

- Completely agree
- Agree
- Disagree
- Completely disagree

H5. In your opinion, does the lack of specific resources in the territory make it difficult to care for Long COVID patients?

- Completely agree
- Agree
- Disagree
- Completely disagree

H6. In your opinion, does the lack of coordination with other healthcare professionals make it difficult to care for Long COVID patients?

- Completely agree
- Agree
- Disagree
- Completely disagree

**I. Quality of Care**

**I1.** In your opinion, are your roles and responsibilities in caring for Long COVID patients satisfactory?

- Completely agree
- Agree
- Disagree
- Completely disagree

**I2**. In your opinion, is public authority support in managing Long COVID satisfactory?

- Completely agree
- Agree
- Disagree
- Completely disagree

**I3.** In your opinion, is the care of Long COVID patients different from what is done for patients with other chronic conditions?

- Completely agree
- Agree
- Disagree
- Completely disagree

**I4.** If you agree, what differences do you identify? ..............................................................................................................................................................................
